# Supplementary material for: Leaf waxes in litter and topsoils along a European transect
Source: Copernicus journal article supplement (doi:10.5194/soil-2-551-2016), 2016-10-25
Supplement: Supplementary file 1 [file Table S01.xlsx]

## Sheet: Tabelle1
Table S1: Geographical data, characterization and climate parameters for all sample locations (con= coniferous forests; dec= deciduous forests; grass= grasslands).
Location	Vegetation	Characterization	Latitude	Longitude	Altitude	mean annual air temperature	Mean annual precipitation	relative humidity
BRO	grass	Poaceae	50.2147	15.51	245	7	570	76.25
HUB	grass	Rubiaceae, Poaceae, Ranunculaceae, Fabaceae, Apiaceae, Rosaceae	46.2831	21.24	117	10	506	74.7
HUG	grass	Brachypodium pinnatum, Bromus erectus, other Poaceae	46.9624	18.02	107	11	520	72.5
HUM	grass	Brachypodium pinnatum, other Poaceae, Lamiaceae, Asteraceae, Fabaceae, Rubiaceae, Apiaceae, Apiaceae	47.4992	19.14	185	10	620	64.375
HUR	grass	Poaceae e Festuca rupicola, Ranunculales, Plantaginaceae, Lamiaceae, Polygonaceae, Rosaceae, Convolvulaceae	48.1	20.48	119	8	560	74.625
KOC	grass	Fragaria sp., Festuca pallens	50.3503	14.15	360	8	470	74.375
L01	grass	Mowed grassland. Surroundings characterised by agriculture	47.4992	18.45	185	10	620	64.375
L02	grass	Extensively used grassland	46.0547	18.04	202	11	630	70.625
L03	grass	Mowed meadow	45.6515	17.03	161	11	880	71
L04	grass	Mowed meadow	46.0282	14.26	361	8	620	78.125
L05	grass	Grassland stripe in cultivated area	47.8879	16.53	146	10.1	574.3	68.5125
L06	grass	Cultivated meadow, mowed. Intensive agricultural use	48.1505	15.58	327	9.9	623.9	69.125
L07	grass	Cultivated meadow, next to a forest	48.132	14.36	559	8.2	1133.6	71.3937
L08	grass	Cultivated meadow	48.7439	12.44	408	8	870	76.75
L09	grass	Mown grassland strip (approx. 30m) between forest and field	48.298	13.24	426	8.3	949.8	70.0875
L10	grass	Mowed meadow, agriculturally used	47.0282	14.26	450	9	1330	76
L11	con	spruce forest, steep hillside	47.38	10.29	886	6.6	1742	79
L11	dec	beech forest, close to fir stand	47.38	10.29	899	6.6	1742	79
L12	con	fir forest	47.8	11.02	889	7.2	1175	74.8
L13	dec	beeches, oaks, limes, sparse pines	49.05	8.23	131	11	783	73.6
L13	grass	glade, next to farmland and fruit trees (apple, plum)	49.06	8.2	121	11	783	73.6
L14	dec	beech forest, sparse firs and oaks	49.22	9.47	247	9.8	841	71.5
L14	grass	grassland in the valley, next to beech forest	49.22	9.47	214	9.8	841	71.5
L15	dec	oak forest, sparse beeches, elms and pines	49.55	8.58	96	10.9	675	68.3
L16	dec	beech forest, steep hillside	50.56	10.35	421	7.7	661	74.7
L16-1	con	sparse pine forest with grass layer	50.56	10.36	450	7.7	661	74.7
L16-2	con	sparse larch forest with grass layer	50.56	10.36	487	7.7	661	74.7
L17	dec	beeches, acers, elms, oaks	50.82	7.17	78	10.3	839	73.1
L17	grass	heath	50.83	7.18	107	10.3	839	73.1
L18	con	luxuriant spruce forest	51.18	8.5	753	5.5	1417	82.8
L18	dec	young beech forest at hillside, close to spruce stand	51.18	8.5	720	5.5	1417	82.8
L18	grass	heath, small shrubs, close to spruce stand, initially cleared	51.18	8.49	829	5.5	1417	82.8
L19	dec	birch forest with small oaks, sparse poplars, surrounded by farmland	52.52	9.68	48	9.6	661	74.7
L19	grass	next to farm track	52.52	9.68	52	9.6	661	74.7
L20	dec	beech-oak-forest	52.99	8.72	31	9.4	696	76.9
L21	con	spruce forest with larches	54.44	9.6	30	8.6	885	79.6
L21	grass	cow pasture, sparse oaks	54.44	9.6	23	8.6	885	79.6
L22	dec	acer forest with poplars, ashes and elder	55.37	10.51	16	8	595	83
L23	con	fir forest with swampy underground	56.03	12.06	20	8.1	606	79.4
L23	dec	beech forest with sparse acers, birches, loamy underground	56.03	12.05	30	8.1	606	79.4
L24	con	spruce-pine-forest with moss layer	57.61	14.21	208	5.3	641	72.9
L25	dec	oak forest, sparse birches and larches	58.53	15.04	90	6.8	533	74.9
L26	con	spruce forest, sparse birches, used as cattle run	58.85	14.91	110	5.4	635	72.9
L26-1	dec	acers, oaks, beeches, sparse firs, on partly pebbly, partly humus-rich floor	58.87	14.9	104	5.4	635	72.9
L26-2	dec	birch- and oak-belt at spruce forest edge, grass layer, also used as cattle run	58.85	14.91	104	5.4	635	72.9
source: www.weatherbase.com
