# Supplementary material for: Leaf waxes in litter and topsoils along a European transect
Source: Copernicus journal article supplement (doi:10.5194/soil-2-551-2016), 2016-10-25
Supplement: Supplementary file 2 [file Table S02.docx]

Table S2: Photographs of the sampling locations

| Coniferous sites | Deciduous sites | Grassland sites |
| --- | --- | --- |
|  |  | 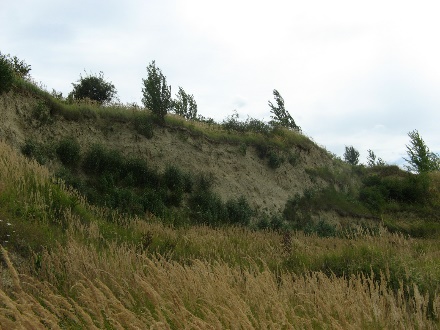  **HUB - grass**  **BRO - grass** |
|  |  | 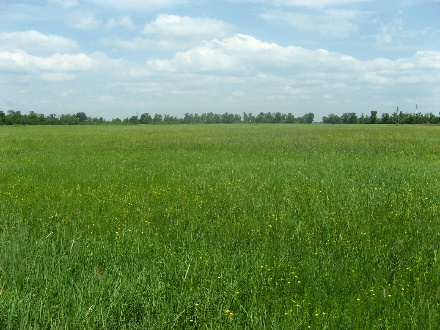 |
|  |  | 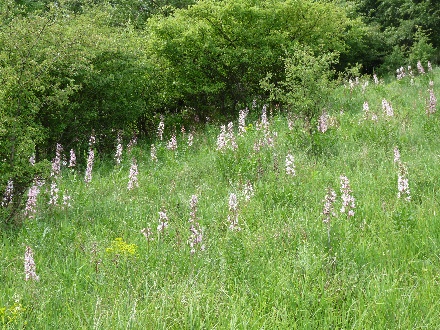  **HUG - grass** |
|  |  | 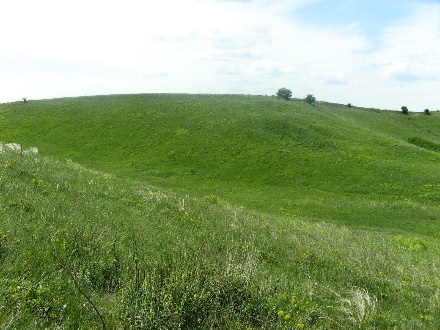  **HUM - grass** |
|  |  | 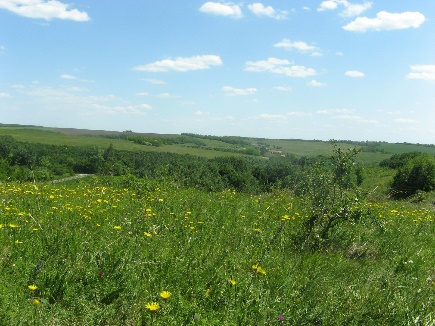  **HUR - grass** |
|  |  | 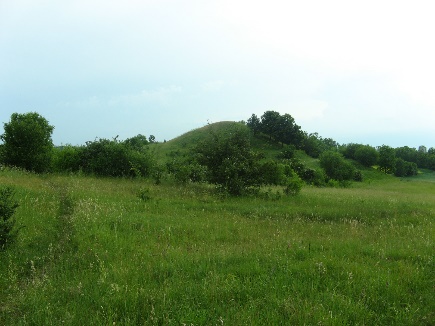  **KOC - grass** |
|  |  | 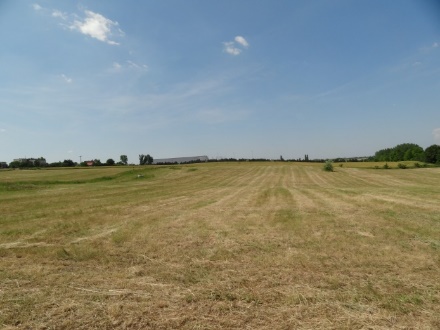  **L1 - grass** |
|  |  | 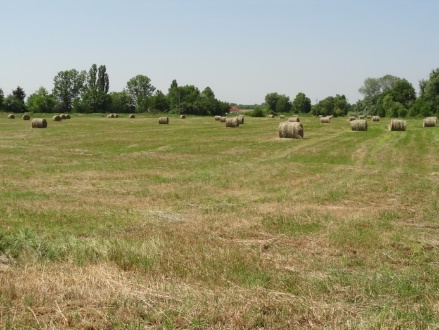  **L2 - grass** |
|  |  | 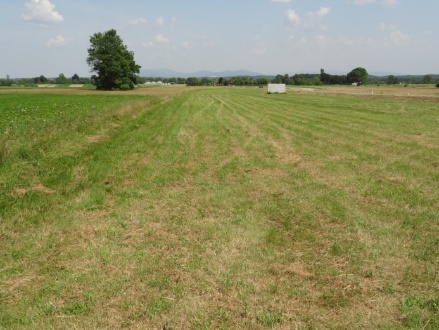  **L3 - grass** |
|  |  | 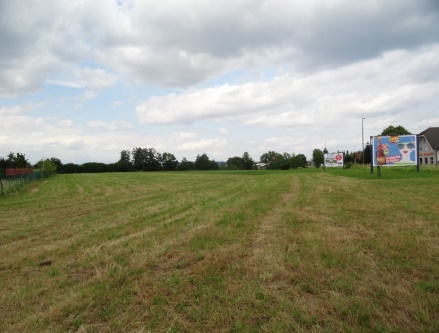  **L4 - grass** |
|  |  | 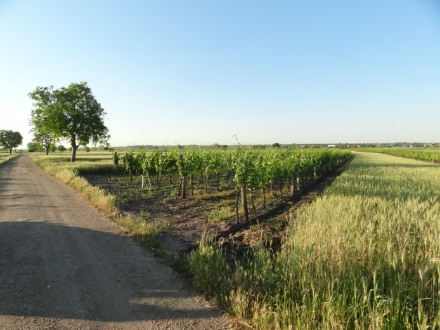  **L5 - grass** |
|  |  | 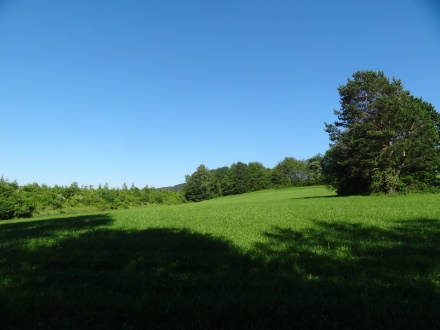  **L6 - grass** |
|  |  | 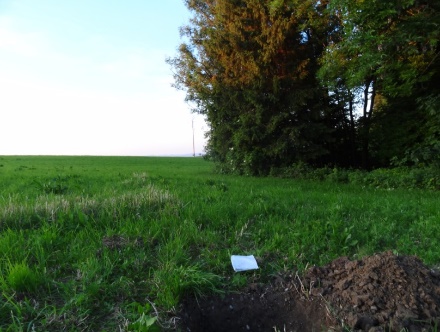  **L7 - grass** |
|  |  | 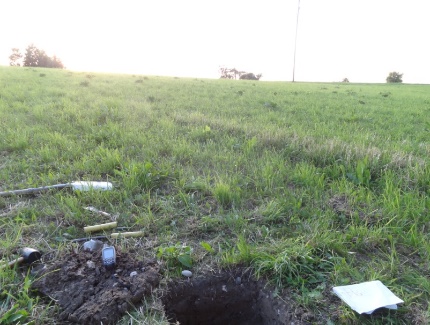  **L8 - grass** |
|  |  | 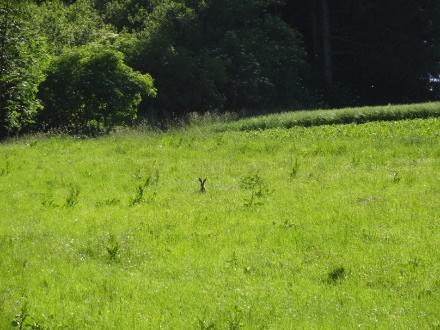  **L9 - grass** |
|  |  | 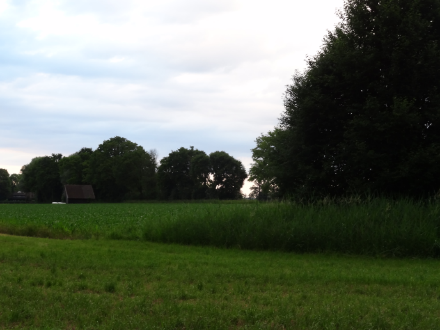  **L10 - grass** |
| 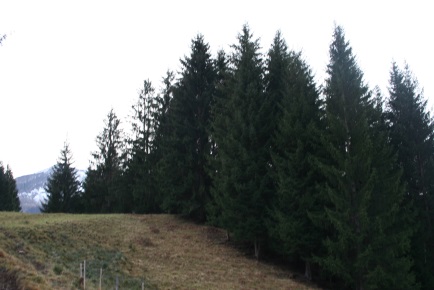  **L11 - con** | 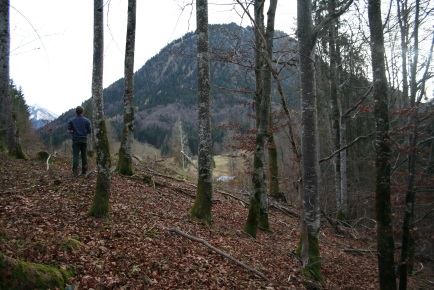  **L11 - dec** |  |
| 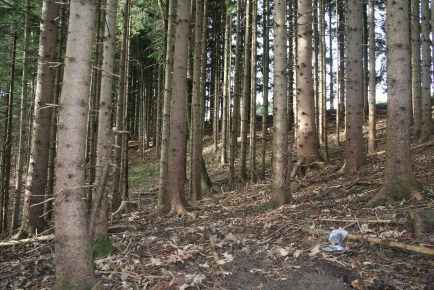  **L12 - con** |  |  |
|  | 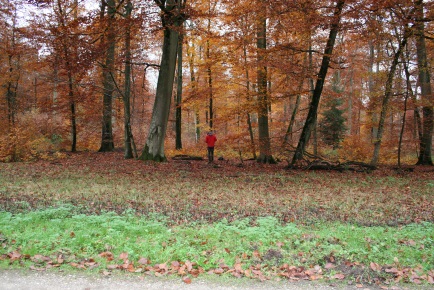  **L13 - dec** | 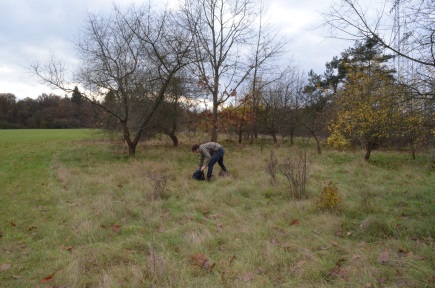  **L13 - grass** |
|  | 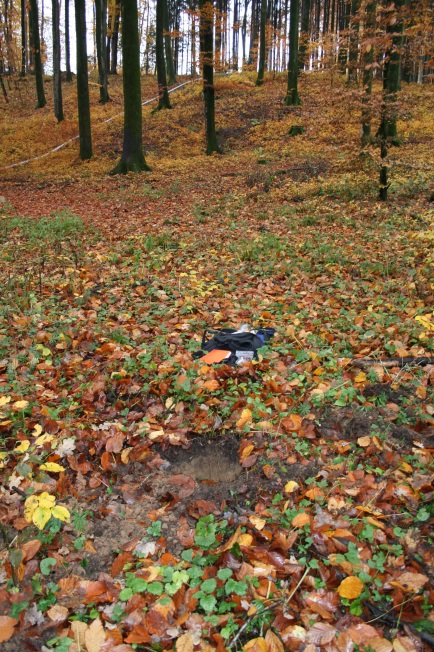  **L14 - dec** | 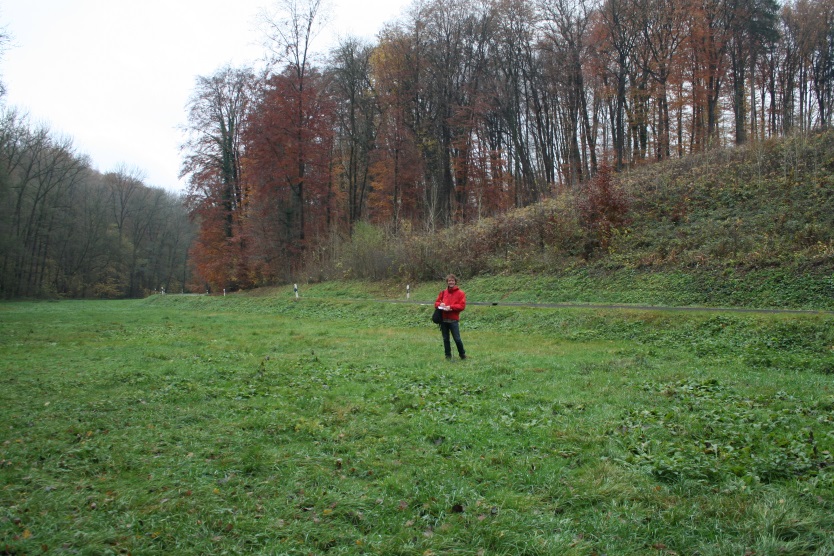  **L14 - grass** |
|  | 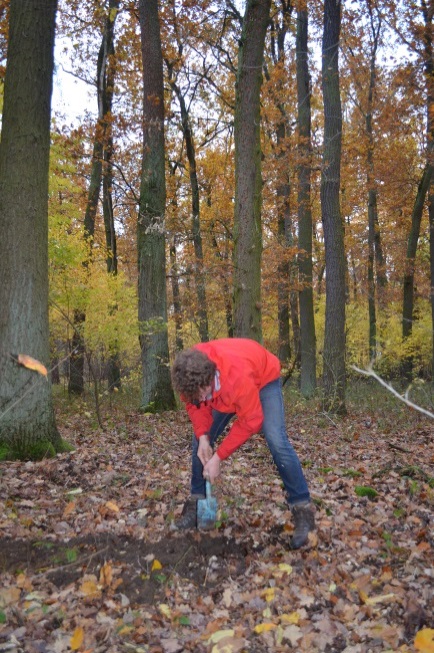  **L15 - dec** |  |
| 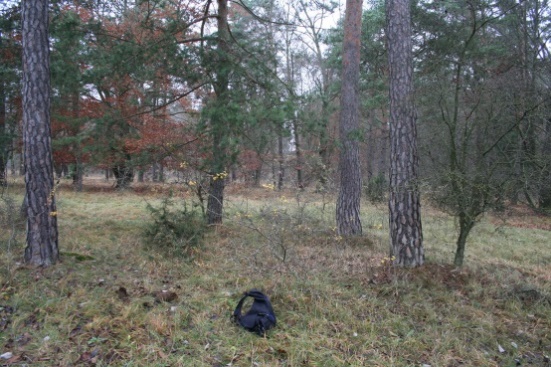  **L16-1 – con** | 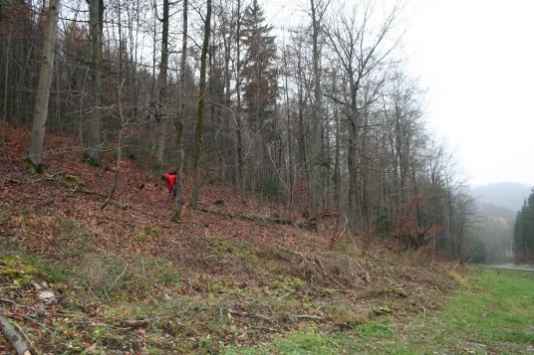  **L16 - dec** |  |
| 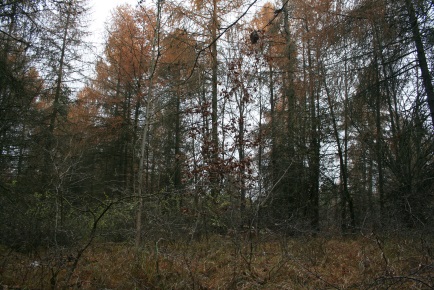  **L16-2 – con** |  |  |
|  | 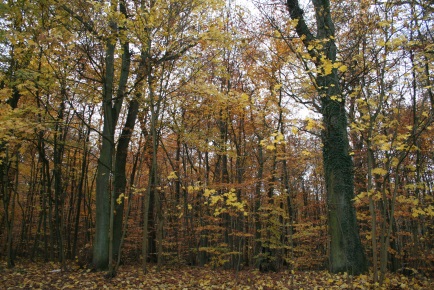  **L17 - dec** | 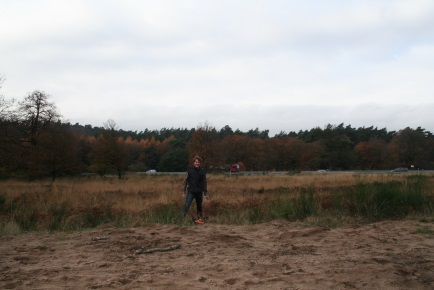  **L17 - grass** |
| 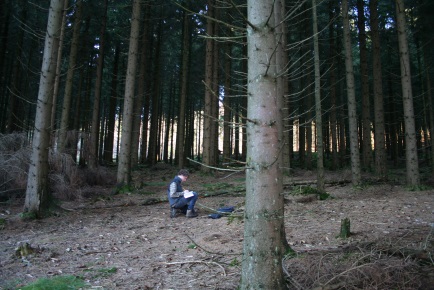  **L18 - con** | 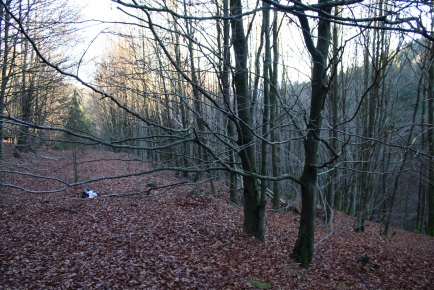  **L18 - dec** | 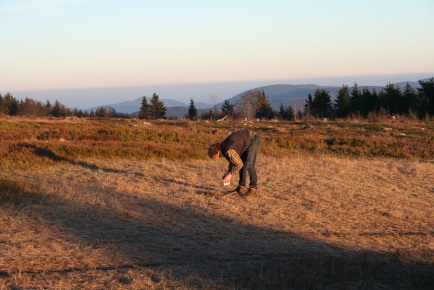  **L18 - grass** |
|  | 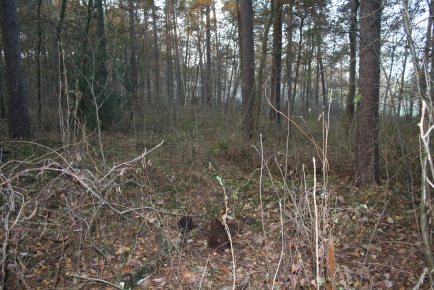  **L19 - dec** | 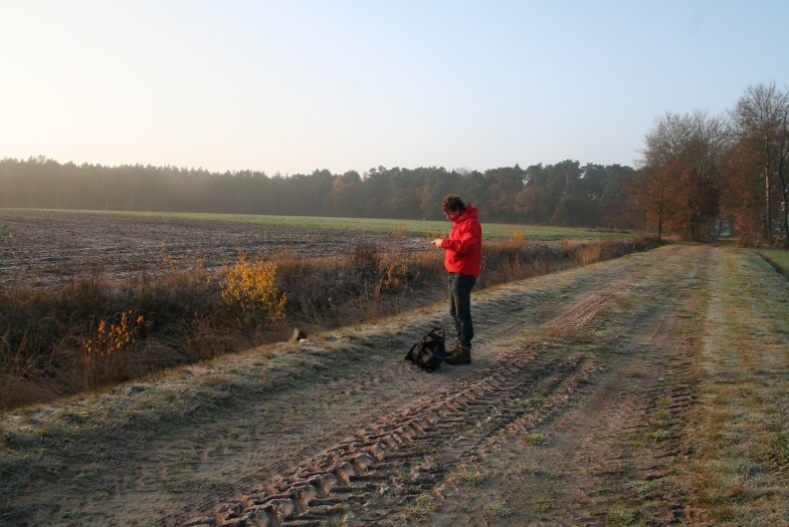  **L19 - grass** |
|  | 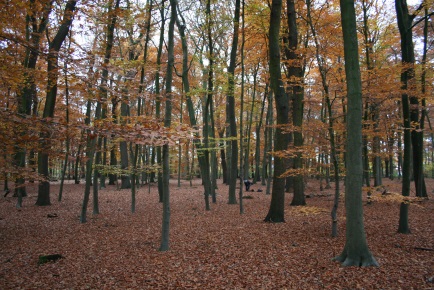  **L20 - dec** |  |
| 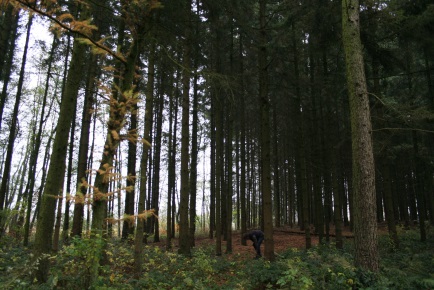  **L21 - con** |  | 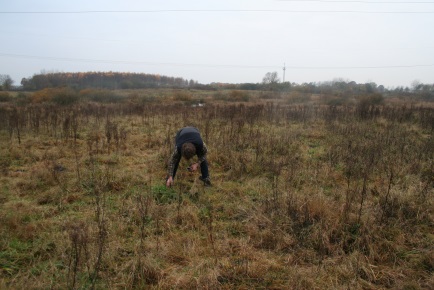  **L21 - grass** |
|  | 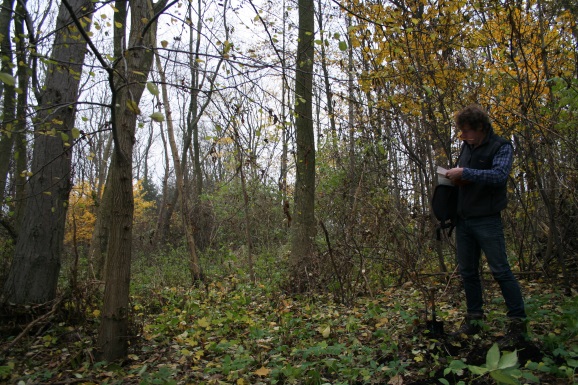  **L22 - dec** |  |
| 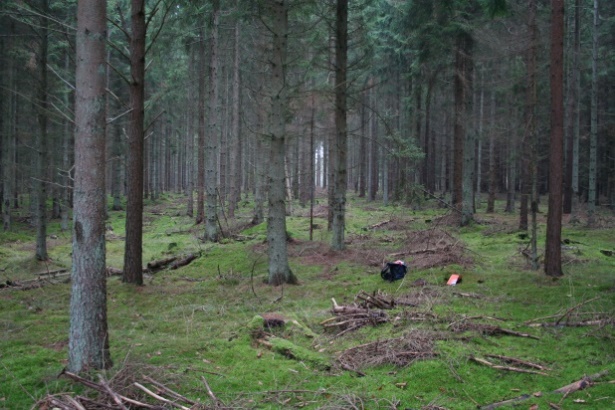  **L23 - con** | 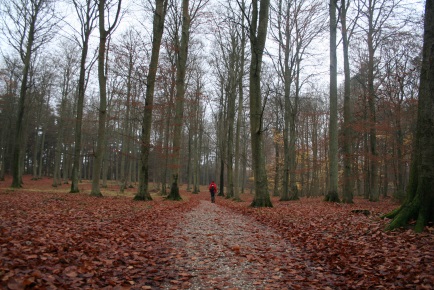  **L23 - dec** |  |
| 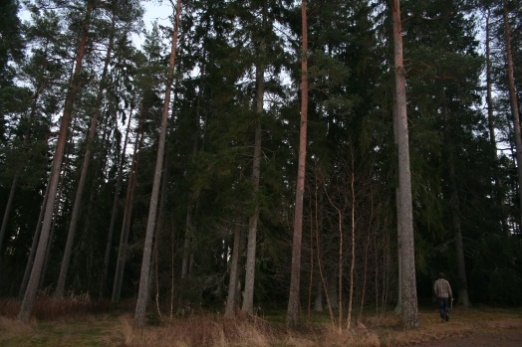  L24 - con |  |  |
| 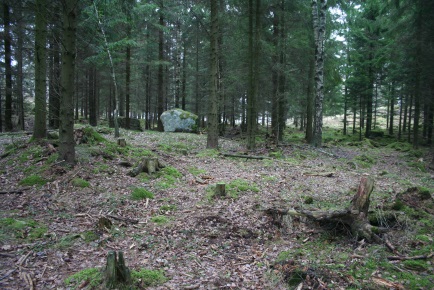  L25 - con | 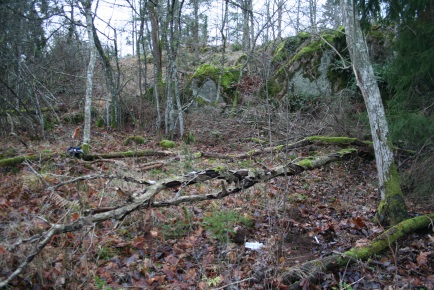  L25-1 - dec |  |
|  | 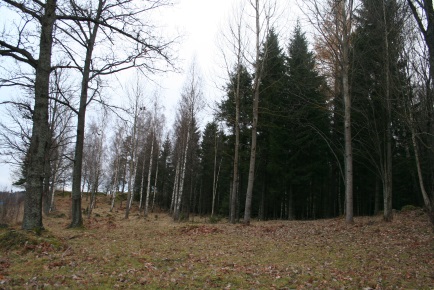  L25-2 - dec |  |
|  | 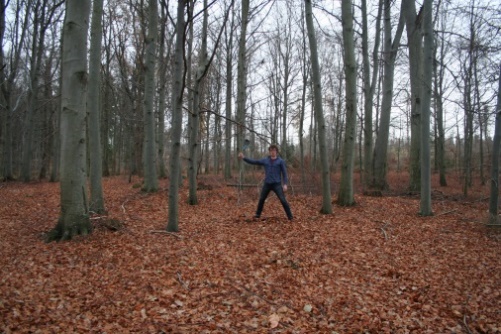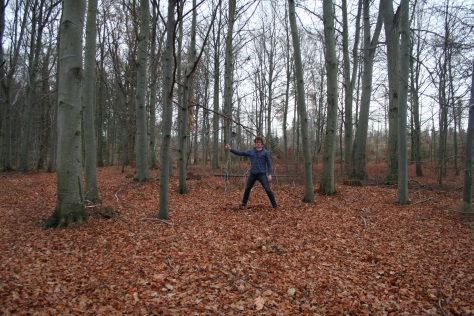  L26 - dec |  |
