# Supplementary material for: Leaf waxes in litter and topsoils along a European transect
Source: Copernicus journal article supplement (doi:10.5194/soil-2-551-2016), 2016-10-25
Supplement: Supplementary file 3 [file Table S03.xlsx]

## Sheet: Tabelle1
Table S3: n-Alkane data table concentrations for n-C25 to n-C35 (µg/g), total concentration (µg/g) and values for OEP, ACL and n-alkane ratio (n-C31+n-C33)/(n-C27+n-C31+n-C33) [L=sample location; V=vegetation (con: coniferous forests; dec: deciduous forests; grass: grasslands); H=sample horizon (L: litter; Ah1: topsoil 1 (0-3cm); Ah2: topsoil 2 (3-10cm)].
			concentration of long chain n-alkanes (µg/g dry weight)
location	vegetation	horizon	C25	C26	C27	C28	C29	C30	C31	C32	C33	C34	C35	Ctot (µg/g dw)	OEP	ACL	(n-C31+n-C33)/(n-C27+n-C31+n-C33)
BRO	grass	Ah1	0.208476	0.128835	0.523665	0.291417	1.5048	0.245248	2.20931	0.30036	1.26375	0.198443	0.224289	7.2	5.7	30.5	0.868976
BRO	grass	Ah2	0.194841	0.128619	0.57772	0.325948	1.07693	0.209977	1.26741	0.232206	0.828055	0.185778	0.215939	5.4	4.2	30.3	0.783884
HUB	grass	Ah1	0.194976	0.152432	0.462192	0.291899	0.795415	0.219118	1.25092	0.226132	0.59119	0	0.238871	4.6	3.5	30.3	0.799422
HUB	grass	Ah2	0.17526	0.129936	0.335385	0.22654	0.586535	0.21155	0.78673	0.200181	0.415224	0	0.212248	3.4	2.8	30.2	0.78184
HUG	grass	Ah1	0.302926	0.110123	1.08068	0.55029	1.48401	0.230054	1.50964	0.233326	0.80594	0.225118	0.236815	6.9	4.3	29.8	0.681802
HUG	grass	Ah2	0.23663	0.140053	0.79686	0.426756	0.97866	0.203186	0.928445	0.225292	0.677275	0.220356	0.232239	5.2	3.4	29.9	0.668332
HUM	grass	Ah1	0.209284	0.134103	0.831735	0.502295	1.51076	0.233132	1.47144	0.214961	0.57782	0.185968	0.180814	6.2	4	29.8	0.711302
HUM	grass	Ah2	0.171127	0.129083	0.640265	0.432013	0.955275	0.20261	0.908165	0.198373	0.428431	0.185646	0.193744	4.6	3	29.8	0.67612
HUR	grass	Ah1	0.548565	0.179439	0.76429	0.49994	1.03807	0.23007	1.25233	0.227946	0.723265	0.200729	0.249179	6.1	3.3	30	0.72105
HUR	grass	Ah2	0.244113	0.121467	0.275161	0.201728	0.378622	0.183744	0.416073	0.188366	0.30997	0.192092	0.198014	2.9	2	30.1	0.72517
KOC	grass	Ah1	0.180328	0.114034	0.355399	0.222269	0.72766	0.194136	1.20247	0.189988	0.456663	0.176336	0.196632	4.1	3.8	30.3	0.823583
KOC	grass	Ah2	0.176795	0.105672	0.367836	0.207295	0.61963	0.186546	0.798915	0.179991	0.355038	0.177252	0.185225	3.5	3.2	30.1	0.758287
L01	grass	Ah1	0.1	0.1	0.2	0.2	0.5	0.2	0.7	0.2	0.3	0.2	0.2	2.8	2.7	30.2	0.833333
L01	grass	Ah2	0.1	0.1	0.2	0.2	0.4	0.2	0.5	0.2	0.2	0	0.2	2.4	2.2	30.2	0.777778
L02	grass	Ah1	0.1	0.1	0.2	0.2	0.3	0.2	0.3	0.2	0.2	0.2	0.2	2.2	1.7	30.1	0.714286
L02	grass	Ah2	0.1	0.1	0.2	0.2	0.3	0.2	0.3	0.2	0.2	0	0.2	2	1.8	30.2	0.714286
L03	grass	Ah1	0.2	0.1	0.3	0.2	0.5	0.2	0.8	0.2	0.4	0.2	0.2	3.4	3	30.3	0.8
L03	grass	Ah2	0.2	0.1	0.3	0.2	0.5	0.2	0.7	0.2	0.4	0.2	0.2	3.2	3	30.3	0.785714
L04	grass	Ah1	0.1	0.1	0.2	0.2	0.3	0.2	0.4	0.2	0.2	0.2	0.2	2.4	2	30.2	0.75
L04	grass	Ah2	0.1	0.1	0.2	0.2	0.4	0.2	0.4	0.2	0.2	0.2	0.2	2.4	2	30.2	0.75
L05	grass	Ah1	0.1	0.1	0.2	0.2	0.4	0.2	0.5	0.2	0.2	0.2	0.2	2.6	2.2	30.1	0.777778
L05	grass	Ah2	0.1	0.1	0.2	0.2	0.3	0.2	0.4	0.2	0.2	0	0.2	2.1	1.8	30.1	0.75
L06	grass	Ah1	0.2	0.1	0.3	0.2	0.5	0.2	0.5	0.2	0.3	0.2	0.2	2.9	2.4	29.9	0.727273
L06	grass	Ah2	0.1	0.1	0.4	0.3	0.7	0.2	0.8	0.2	0.4	0.2	0.2	3.5	2.9	30	0.75
L07	grass	Ah1	0.2	0.1	0.3	0.2	0.7	0.2	0.8	0.2	0.3	0	0.2	3.2	3.4	30.1	0.785714
L07	grass	Ah2	0.1	0.1	0.2	0.2	0.7	0.2	0.7	0.2	0.3	0.2	0.2	3.2	3.2	30.2	0.833333
L08	grass	Ah1	0.1	0.1	0.3	0.2	0.5	0.2	0.6	0.2	0.3	0.2	0.2	3	2.5	30.1	0.75
L08	grass	Ah2	0.1	0.1	0.3	0.2	0.5	0.2	0.5	0.2	0.2	0.2	0.2	2.7	2.3	30	0.7
L09	grass	Ah1	0.1	0.1	0.2	0.2	0.4	0.2	0.5	0.2	0.3	0.2	0.2	2.7	2.3	30.2	0.8
L09	grass	Ah2	0.2	0.1	0.3	0.2	0.6	0.2	0.7	0.2	0.4	0.2	0.2	3.3	2.8	30.2	0.785714
L10	grass	Ah1	0.3	0.1	0.7	0.3	1.1	0.2	1.2	0.2	0.6	0.2	0.2	5.1	4.5	30	0.72
L11	con	L	0.14	0.07	0.22	0.09	0.36	0.05	0.36	0	0.15	0	0	1.44	5.2	29.8	0.69863
L11	con	Ah1	0.35	0.16	0.75	0.23	2.02	0.22	2.94	0.15	1.3	0	0.18	8.3	9.2	30.4	0.849699
L11	con	Ah2	0.14	0.09	0.25	0.09	0.51	0	0.69	0	0.28	0	0	2.05	9.7	30.1	0.795082
L11	dec	L	1.54	0.71	19.71	0.37	2.05	0	1.09	0	0.32	0	0	25.79	21.5	27.4	0.0667614
L11	dec	Ah1	0.35	0.27	3.99	0.19	0.86	0.11	0.61	0	0.26	0	0	6.64	10.1	28	0.179012
L11	dec	Ah2	0.14	0.13	0.63	0.09	0.27	0.12	0.18	0.11	0.37	0	0.05	2.09	3.2	29.4	0.466102
L12	con	L	0.93	0.25	1.95	0.45	4.25	0.59	17.32	0.53	3.27	0.09	0.31	29.94	14.7	30.6	0.913487
L12	con	Ah1	0.15	0.09	0.25	0.09	0.49	0	1.14	0	0.34	0	0	2.55	12	30.4	0.855491
L12	con	Ah2	0.15	0.11	0.21	0.1	0.38	0.19	0.76	0.06	0.62	0.04	0.03	2.65	4.3	30.8	0.867925
L13	dec	L	2.26	0.78	28.8	0.47	2.75	0.11	0.5	0	0.1	0	0	35.77	23.8	27.3	0.0204082
L13	dec	Ah1	0.24	0.11	2.29	0.08	0.4	0	0.13	0	0	0	0	3.25	15	27.5	0.053719
L13	dec	Ah2	0.04	0.04	0.14	0.03	0.06	0.01	0.03	0	0	0	0	0.35	3	28.1	0.176471
L13	grass	Ah1	0.07	0.04	0.12	0.09	0.25	0.03	0.37	0.03	0.22	0.04	0.03	1.29	5.3	30.4	0.830986
L13	grass	Ah2	0.06	0.04	0.09	0.06	0.17	0.04	0.22	0.01	0.13	0	0	0.82	3.9	30.2	0.795455
L14	dec	L	2.54	1.14	53.44	0.56	4.53	0.1	0.92	0	0.09	0	0	63.32	32.8	27.2	0.0185491
L14	dec	Ah1	0.16	0.07	1	0.08	0.27	0.06	0.18	0.03	0.21	0	0	2.06	7.1	28.5	0.280576
L14	dec	Ah2	0.07	0.04	0.24	0.04	0.08	0.02	0.06	0.01	0.09	0	0	0.65	4.4	29	0.384615
L14	grass	Ah1	0.08	0.05	0.27	0.18	0.66	0.05	0.71	0	0.32	0	0.1	2.42	6.8	30.1	0.792308
L14	grass	Ah2	0.06	0.05	0.17	0.11	0.47	0.05	0.53	0	0.21	0	0.05	1.7	6.6	30.1	0.813187
L15	dec	L	1.1	0.3	4.89	0.36	2.53	0.17	1.29	0	0.35	0	0	10.99	10.9	28.4	0.251149
L15	dec	Ah1	0.22	0.07	0.61	0.1	0.59	0.05	0.3	0	0.08	0	0	2.02	7.2	28.8	0.383838
L15	dec	Ah2	0.09	0.03	0.12	0.02	0.13	0.02	0.08	0	0.08	0	0	0.57	5.7	29.6	0.571429
L16	dec	L	0.69	0.29	3.44	0.86	13.48	0.73	12.81	0.34	3.05	0	0.16	35.85	14.7	29.9	0.821762
L16	dec	Ah1	0.25	0.13	0.88	0.43	1.9	0.19	2.94	0.15	1.3	0	0.1	8.27	7.8	30.3	0.828125
L16	dec	Ah2	0.14	0.11	0.6	0.36	0.84	0.09	1.28	0.09	0.63	0	0.06	4.2	5.2	30.2	0.760956
L16-1	con	L	1.75	0.47	8.89	0.86	18.36	0.8	23.26	0.59	15.11	0	0.26	70.35	24.1	30.4	0.811892
L16-1	con	Ah1	0.18	0.1	0.65	0.33	1.23	0.1	1.63	0.08	0.73	0	0.06	5.09	6.9	30.2	0.784053
L16-1	con	Ah2	0.11	0.09	0.42	0.22	0.77	0.09	1.11	0.07	0.51	0	0.06	3.45	6	30.2	0.794118
L16-2	con	L	3.83	1.32	61.82	0.69	4.27	0.17	1.22	0.1	0.37	0	0.1	73.89	29.6	27.2	0.0250749
L16-2	con	Ah1	0.28	0.17	1.55	0.21	0.7	0.23	0.68	0.07	1.05	0	0.09	5.03	5.9	29.6	0.527439
L16-2	con	Ah2	0.15	0.09	0.5	0.14	0.35	0.13	0.42	0.07	0.59	0	0.07	2.51	4.3	30.2	0.668874
L17	dec	L	8.05	1.86	45.2	1.82	15.78	0.65	4.66	0.21	0.71	0	0.12	79.06	14.6	27.8	0.106189
L17	dec	Ah1	1.03	0.28	4.21	0.31	2.4	0.15	1.3	0.09	0.61	0.03	0.07	10.48	10.3	28.6	0.312092
L17	dec	Ah2	0.4	0.18	1.17	0.2	1.16	0.12	1.03	0.09	0.7	0.03	0.06	5.14	6.8	29.6	0.596552
L17	grass	Ah1	0.08	0.04	0.14	0.06	0.23	0.07	0.33	0.03	0.31	0	0.04	1.33	5	30.6	0.820513
L17	grass	Ah2	0.08	0.04	0.1	0.06	0.15	0.05	0.21	0.04	0.19	0	0.03	0.95	3.5	30.5	0.8
L18	con	L	1.38	0.62	3.03	0.74	3.53	0.59	3.06	0.41	1.49	0	0	14.85	4.7	29.5	0.600264
L18	con	Ah1	0.88	0.42	4.3	0.75	5.7	0.66	6.15	0.47	2.82	0.07	0.21	22.43	8.3	29.8	0.675961
L18	con	Ah2	0.57	0.35	2.75	0.54	3.61	0.41	4.4	0.28	2	0.05	0.14	15.1	8.1	29.9	0.699454
L18	dec	L	5.5	1.74	66.13	1.05	4.87	1.05	5.85	0	0.66	0	1.9	88.75	20.2	27.5	0.08962
L18	dec	Ah1	0.39	0.18	4.28	0.12	0.98	0.07	0.74	0.03	0.15	0	0	6.94	15.2	27.9	0.172147
L18	dec	Ah2	0.32	0.16	2.48	0.11	0.73	0.06	0.59	0.03	0.15	0	0.02	4.65	10.9	28.2	0.229814
L18	grass	Ah1	0.59	0.22	1.47	0.45	3.72	0.42	6.12	0.37	3.2	0.1	0.32	16.98	9.9	30.5	0.863763
L18	grass	Ah2	0.31	0.13	0.76	0.26	1.84	0.24	3.23	0.23	1.94	0.06	0.19	9.19	9	30.6	0.871838
L19	dec	L	110.2	6.52	130.6	3.62	56.71	3.13	81.01	3.27	18.77	0	0	413.83	17.4	28.9	0.433111
L19	dec	Ah1	3.88	0.43	6.96	0.39	3.97	0.4	8.21	0.52	3.59	0.07	0.11	28.53	13	29.7	0.628998
L19	dec	Ah2	0.14	0.07	0.27	0.06	0.25	0.09	0.97	0.14	1.06	0	0	3.05	7.1	31.2	0.882609
L19	grass	Ah1	0.12	0.05	0.41	0.17	1.06	0.09	1.78	0.08	0.7	0	0.03	4.49	10.1	30.4	0.858131
L19	grass	Ah2	0.09	0.04	0.24	0.13	0.46	0.04	0.6	0.03	0.25	0	0.02	1.9	6.5	30.1	0.779817
L20	dec	L	10.84	1.7	50.57	1.59	13.71	0.44	2.55	0.11	0.23	0	0	81.74	17.5	27.6	0.0521087
L20	dec	Ah1	2.16	0.49	12.05	0.49	4.14	0.17	0.99	0.06	0.23	0	0	20.78	14.5	27.8	0.0919367
L20	dec	Ah2	0.49	0.17	1.41	0.18	1.12	0.12	0.77	0.08	0.43	0.02	0.03	4.82	6.8	29.1	0.45977
L21	con	L	2.32	0.49	10.83	0.97	11.62	0.42	3.06	0.14	0.93	0	0.15	30.93	13.1	28.6	0.269231
L21	con	Ah1	0.33	0.14	1.09	0.18	1.83	0.14	0.94	0.09	0.5	0	0.06	5.3	7.9	29.4	0.56917
L21	con	Ah2	0.14	0.06	0.69	0.11	1.1	0.05	0.4	0.03	0.27	0	0.03	2.88	10	29.2	0.492647
L21	grass	Ah1	0.16	0.1	0.37	0.14	0.94	0.18	1.67	0.11	1.05	0.26	0	4.98	7.6	30.7	0.880259
L21	grass	Ah2	0.15	0.1	0.27	0.12	0.72	0.13	1.59	0.09	1.15	0.14	0	4.46	8.4	30.9	0.910299
L22	dec	L	2.79	0.53	4.98	0.76	8.5	1.02	30.65	1.1	7	0.21	0.56	58.1	15	30.6	0.883181
L22	dec	Ah1	2.86	0.82	6.36	0.98	8.73	0.79	11.76	0.56	3.11	0.18	0.56	36.71	9.5	29.8	0.700424
L22	dec	Ah2	1.93	0.56	4.12	0.63	5.25	0.45	5.93	0.3	1.6	0.09	0.27	21.13	8.7	29.6	0.646352
L23	con	L	1.42	0.5	1.96	0.56	2.37	0.4	2.07	0.28	1.24	0	0.13	10.93	4.4	29.7	0.628083
L23	con	Ah1	0.66	0.16	1.12	0.22	1.48	0.24	2.33	0.25	1.56	0.05	0.1	8.17	7.4	30.3	0.776447
L23	con	Ah2	0.15	0.06	0.32	0.08	0.67	0.11	1.97	0.17	1.63	0.03	0.06	5.25	11.2	31.1	0.918367
L23	dec	L	11.46	2.28	106.8	1.08	5.67	0.32	4.6	0.22	1.3	0	0.13	133.86	30.3	27.3	0.0523514
L23	dec	Ah1	1.39	0.49	15.88	0.31	1.58	0.11	1.3	0.06	0.53	0	0.07	21.72	19.9	27.6	0.103331
L23	dec	Ah2	0.19	0.09	1.32	0.06	0.38	0.03	0.44	0.04	0.26	0	0	2.81	10.7	28.7	0.346535
L24	con	L	18.82	1.19	27.36	0.91	7.11	0.56	12.12	0.48	3.1	0	0	71.65	15.8	28.6	0.357445
L24	con	Ah1	1.6	0.33	3.53	0.55	4.23	0.47	6.57	0.33	1.91	0.05	0.09	19.66	9.7	29.8	0.706078
L24	con	Ah2	0.12	0.08	0.32	0.14	0.94	0.1	1.18	0.07	0.54	0	0.02	3.51	7.7	30.3	0.843137
L25	dec	L	18.43	2.28	65.68	1.88	9.13	0.71	3.94	0	0	0	32.19	134.24	16.2	27.4	0.0565929
L25	dec	Ah1	0.28	0.08	1.33	0.06	0.37	0.04	0.38	0.03	0.13	0	0	2.7	11.2	28.4	0.277174
L25	dec	Ah2	0.12	0.04	0.27	0.05	0.27	0.03	0.38	0.03	0.13	0	0	1.32	7	29.7	0.653846
L26	con	L	58.17	3.75	89.88	2.22	25.92	4.37	76.74	3.38	16.54	0	3.2	284.17	15.2	29.2	0.509282
L26	con	Ah1	0.65	0.18	2.04	0.39	3.75	0.33	5.62	0.25	1.97	0.05	0.13	15.36	11.6	30.1	0.788162
L26	con	Ah2	0.17	0.08	0.48	0.14	0.97	0.1	1.28	0.06	0.53	0	0.06	3.87	8.8	30.1	0.790393
L26-1	dec	L	17.57	1.67	26.73	4.37	63.64	8.01	101	5.31	25.89	8.62	17.39	280.2	11.2	30.2	0.825999
L26-1	dec	Ah1	1.65	0.25	4.38	0.42	7.35	0.58	10.63	0.5	2.03	0.03	0.16	27.98	14	29.8	0.742958
L26-1	dec	Ah2	1.13	0.21	3.12	0.36	5.21	0.36	5.88	0.29	1.35	0.03	0.13	18.07	12.7	29.7	0.698551
L26-2	dec	L	316.6	16.77	359.6	9.13	133.9	12.1	420	14.74	103.8	2.8	78.7	1468.14	19.3	29.5	0.592936
L26-2	dec	Ah1	0.97	0.18	2.53	0.34	4.4	0.27	4.76	0.19	1.36	0.04	0.09	15.13	13.3	29.8	0.707514
L26-2	dec	Ah2	0.24	0.1	0.82	0.19	1.88	0.14	2.05	0.1	0.82	0.02	0.11	6.47	10.5	30	0.777778
