# Supplementary material for: Leaf waxes in litter and topsoils along a European transect
Source: Copernicus journal article supplement (doi:10.5194/soil-2-551-2016), 2016-10-25
Supplement: Supplementary file 4 [file Table S04.docx]

**Table S4: p-values of post-hoc tests for differences between the mean Ctot of long chain *n*-alkanes and vegetation types (top) and between Ctot and horizons within the same vegetation type (bottom), p<0.05 indicates a significant relationship at the 95% confidence level (bold values), con= coniferous trees, dec= deciduous trees, grass= grasslands, L: litter, Ah1= topsoil 1 (0-3 cm), Ah2= topsoil 2 (3-10 cm), L25, L26-1, L26-2, grey numbers indicate no significant differences in ANOVA/Kruskal-Wallis.**

| **Vegetation types** | | | |
| --- | --- | --- | --- |
|  | **L** | **Ah1** | **Ah2** |
| con-dec | 0.26 | 1.00 | 0.35 |
| con-grass | - | **0.02** | 0.35 |
| dec-grass | - | **0.01** | 0.35 |
| **Horizons** | | | |
|  | **con** | **dec** | **grass** |
| L-Ah1 | 0.11 | 0.56 | - |
| L-Ah2 | 0.07 | 0.44 | - |
| Ah1-Ah2 | 0.97 | 0.99 | 0.17 |
