# Supplementary material for: Leaf waxes in litter and topsoils along a European transect
Source: Copernicus journal article supplement (doi:10.5194/soil-2-551-2016), 2016-10-25
Supplement: Supplementary file 8 [file Table S10.xlsx]

## Sheet: Tabelle1
Table S10: n-Alkanoic acid concentrations for n-C16 to n-C34, total concentration (µg/g) and values for EOP, ACL, Indices D, C and G (con= coniferous forests; dec= deciduous forests; grass= grasslands), L=litter; Ah1=topsoil 1 (0-3cm); Ah2=topsoil 2 (3-10cm).
			concentration of long chain n-alcanoic acids (µg/g dry weight)
location	vegetation	horizon	C16	C18	C20	C22	C23	C24	C25	C26	C27	C28	C29	C30	C31	C32	C33	C34	Ctot (µ/g dw)	EOP	ACL	Index D	Index C	Index G
L01	grass	Ah1	1.01	0.47	0.4	0.52	0.43	0.7	0.35	0.59	0.32	0.49	0.33	0.5	0.33	0.41	0.31	0.34	6	1.53	27.51	0.25	0.36	0.39
L01	grass	Ah2	0.5	0.36	0.32	0.33	0.33	0.38	0.32	0.37	0.31	0.36	0.31	0.38	0.32	0.35	0	0.33	4.4	1.15	27.93	0.26	0.27	0.48
L02	grass	Ah2	1.03	0.57	0.4	0.5	0.43	0.56	0.34	0.44	0.32	0.39	0.31	0.38	0.32	0.36	0	0.33	5.08	1.24	27.57	0.24	0.34	0.42
L03	grass	Ah1	2.41	1.06	0.81	1.69	1.14	1.94	0.55	1.59	0.4	1.2	0.32	1.31	0.31	1.13	0.31	0.57	13.26	2.64	27.47	0.25	0.4	0.35
L04	grass	Ah1	1.96	0.81	0.63	0.89	0.56	0.97	0.38	0.75	0.34	0.58	0.34	0.53	0.33	0.42	0	0.34	7.06	1.68	27.19	0.25	0.42	0.33
L04	grass	Ah2	0.77	0.41	0.35	0.37	0.34	0.41	0.33	0.41	0.32	0.41	0.32	0.41	0.32	0.37	0	0.33	4.69	1.24	27.91	0.27	0.27	0.46
L05	grass	Ah1	2.09	1	0.75	1.24	0.86	1.83	0.5	1.48	0.48	1.05	0.43	0.93	0.37	0.56	0.32	0.39	11.19	2.22	26.95	0.28	0.48	0.25
L05	grass	Ah2	1.05	0.54	0.39	0.46	0.4	0.56	0.34	0.45	0.32	0.4	0.32	0.39	0.32	0.36	0.31	0.33	5.34	1.26	27.58	0.24	0.34	0.42
L06	grass	Ah1	1.91	0.99	0.74	1.1	0.3	1.42	0.46	0.97	0.43	0.9	0.39	0.88	0.36	0.61	0.32	0.41	9.29	2.47	27.29	0.27	0.42	0.3
L06	grass	Ah2	1.42	0.7	0.57	0.81	0.55	1.01	0.4	0.69	0.37	0.62	0.35	0.58	0.35	0.45	0.32	0.36	7.41	1.66	27.27	0.25	0.41	0.33
L07	grass	Ah1	1.91	1.24	0.71	1.21	0.78	1.65	0.46	2.06	0.38	1.21	0.36	0.96	0.35	0.59	0.32	0.41	11.43	2.78	27	0.31	0.43	0.26
L07	grass	Ah2	0.87	0.57	0.38	0.49	0.4	0.59	0.34	0.56	0.32	0.44	0.32	0.41	0.32	0.36	0	0.32	5.23	1.39	27.48	0.26	0.34	0.4
L08	grass	Ah1	1.53	1.01	0.66	1.21	0.82	1.42	0.49	1.84	0.39	1.15	0.37	0.98	0.35	0.68	0.32	0.49	11.17	2.51	27.23	0.31	0.38	0.31
L08	grass	Ah2	1.1	0.65	0.44	0.63	0.52	0.83	0.4	0.73	0.35	0.63	0.34	0.56	0.33	0.43	0	0.36	6.56	1.63	27.39	0.28	0.37	0.35
L09	grass	Ah1	1.17	0.58	0.5	0.65	0.47	0.69	0.39	0.6	0.36	0.59	0.35	0.64	0.35	0.51	0.32	0.39	6.79	1.59	27.79	0.27	0.32	0.41
L09	grass	Ah2	1.56	0.74	0.6	0.89	0.63	1.12	0.34	0.98	0.42	0.93	0.32	0.99	0.31	0.75	0.34	0.49	9.12	2.36	27.7	0.28	0.34	0.38
L10	grass	Ah1	3.53	1.79	1.09	1.79	1.05	2.59	0.82	0.31	0.59	2.61	0.54	2.01	0.31	1.32	0.31	0.77	16.13	2.67	27.81	0.36	0.36	0.29
L10	grass	Ah2	2.91	1.27	0.73	0.99	0.31	1.43	0.56	0.35	0.46	1.4	0.41	1.13	0.31	0.83	0.33	0.55	9.79	2.5	27.84	0.33	0.34	0.33
L11	con	L	13.89	5.49	51.73	15.51	5.32	15.92	1.56	4.2	0.43	2.16	0.44	3.32	0.42	1.92	0	0.86	123.17	3.4	25.9	0.1	0.76	0.13
L11	con	Ah1	5.24	4.44	5.99	14.93	6.25	17.02	3.42	9.11	2.04	7.9	2.02	8.2	1.46	5.83	0.55	1.86	96.26	3.2	27	0.24	0.52	0.24
L11	con	Ah2	2.74	2.14	4.34	9.16	4.48	12.74	3.39	9.7	2.85	9.44	3.29	9.04	2.23	6.02	0.87	2.06	84.49	2.9	27.4	0.31	0.42	0.27
L11	dec	L	6.25	13.28	6.9	34.28	7.79	26.84	4.55	11.29	7.97	36.19	2.57	8.24	0.59	2.34	0.16	0.68	169.92	3.6	26.8	0.55	0.41	0.05
L11	dec	Ah1	0.94	1.25	1.04	6.35	1.32	5.28	1.18	2.76	2.09	7.16	0.83	1.81	0.27	0.6	0.09	0.17	33.14	3.1	26.8	0.54	0.4	0.06
L11	dec	Ah2	0	0.18	0.18	1.16	0.34	1	0.24	0.52	0.3	0.79	0.16	0.32	0.09	0.16	0	0	5.44	2.5	26.7	0.41	0.51	0.08
L12	con	L	13.22	6.47	6.86	17.76	4.81	15.92	1.63	4.74	0.8	4.67	0.95	5.32	0.72	3.86	0	0.85	88.58	3.9	26.6	0.18	0.63	0.19
L12	con	Ah1	0.83	0.7	1.36	3.07	1.46	4.67	1.12	3.59	0.86	3.4	0.98	3.23	0.69	2.42	0.27	0.77	29.42	3.4	27.4	0.3	0.41	0.28
L12	con	Ah2	0.46	0.43	0.67	1.5	0.87	2.96	0.94	2.97	0.77	3.07	0.81	2.7	0.54	1.7	0.21	0.6	21.2	3.4	27.6	0.37	0.36	0.28
L13	dec	L	5.48	2.27	3.29	16.79	4.76	14.45	3.99	14.72	9.21	49.72	3.34	9.22	0.71	2.26	0.17	0.48	140.86	4.1	27.3	0.74	0.22	0.04
L13	dec	Ah1	0.7	0.3	0.3	1.63	0.39	1.65	0.4	1.5	0.91	4.11	0.5	1.32	0.15	0.45	0.04	0.07	14.42	3.8	27.4	0.65	0.26	0.08
L13	dec	Ah2	0.17	0.11	0.05	0.27	0.08	0.38	0.08	0.28	0.14	0.52	0.1	0.26	0.03	0.09	0.01	0.01	2.58	3.5	27.2	0.52	0.38	0.1
L13	grass	Ah1	0.52	0.27	0.4	0.98	0.6	1.34	0.57	1.48	0.42	1	0.28	1.1	0.17	0.9	0.08	0.37	10.48	2.9	27.6	0.28	0.37	0.35
L13	grass	Ah2	0.33	0.18	0.32	0.76	0.49	1.2	0.38	1.22	0.32	0.98	0.28	0.93	0.15	0.67	0.07	0.25	8.53	3.1	27.5	0.32	0.39	0.3
L14	dec	L	19.33	5.86	3.55	10.73	4.9	8.84	2.95	9.81	4.02	34.18	1.42	4.53	0.2	1.16	0	0.19	111.67	4.3	27.3	0.77	0.2	0.03
L14	dec	Ah1	0.33	0.2	0.23	0.97	0.33	0.99	0.24	0.84	0.38	1.71	0.23	0.71	0.09	0.31	0.03	0.09	7.68	3.5	27.3	0.55	0.32	0.13
L14	dec	Ah2	0.47	0.2	0.21	0.86	0.31	1	0.37	0.96	0.57	1.9	0.4	1.05	0.16	0.43	0.06	0.16	9.11	2.9	27.6	0.54	0.29	0.17
L14	grass	Ah1	0.41	0.19	0.11	0.22	0.14	0.33	0.11	0.47	0.07	0.37	0.07	0.37	0.05	0.32	0.03	0.19	3.45	4.2	27.9	0.31	0.27	0.42
L14	grass	Ah2	0.13	0.07	0.06	0.13	0.08	0.25	0.12	0.39	0.07	0.36	0.07	0.4	0.06	0.3	0.03	0.13	2.65	4.2	28.1	0.35	0.24	0.41
L15	dec	L	0.93	0.53	0.92	2.67	0.85	2.93	1.22	7.03	2.26	13.08	2.17	8.4	0.83	2.89	0.2	0.48	47.39	4.7	28.1	0.67	0.15	0.17
L15	dec	Ah1	0.53	0.27	0.49	1.63	0.49	2.05	1.16	3.73	1.73	6.4	1.78	5.39	0.65	2.11	0.17	0.42	29	3.4	28.2	0.58	0.19	0.23
L15	dec	Ah2	0.33	0.18	0.31	0.98	0.32	1.21	0.59	1.69	0.77	2.51	0.66	2.11	0.28	0.93	0.11	0.29	13.27	3.2	28	0.51	0.24	0.25
L16	dec	L	17.12	10.56	5.15	17.01	4.41	9.94	2.28	5.68	3.17	27.35	1.15	3.15	0.18	0.53	0.04	0.15	107.87	4.2	27.1	0.72	0.26	0.02
L16	dec	Ah1	0.74	0.73	0.73	2.48	1.07	2.71	0.8	1.97	1.03	3.61	0.7	1.88	0.34	0.85	0.11	0.27	20.02	2.8	27.3	0.49	0.36	0.15
L16	dec	Ah2	0.88	0.41	0.57	1.69	0.8	2.45	0.71	1.98	0.74	2.42	0.57	1.51	0.32	0.83	0.13	0.31	16.32	2.9	27.2	0.4	0.41	0.19
L16-1	con	L	9.75	3.26	6.85	15.5	4.03	12.09	1.9	6.2	0.98	6.88	1.66	12.07	1.68	9.71	0.78	4.22	97.56	4.6	28	0.21	0.37	0.42
L16-1	con	Ah1	3.78	1.23	3.84	10.68	2.68	7.98	1.45	4.45	0.76	3.21	0.89	3.66	0.67	2.7	0.3	1.24	49.52	3.4	27	0.21	0.53	0.26
L16-1	con	Ah2	1.06	0.5	1.45	3.7	1.19	3.85	1.17	2.54	0.8	1.64	0.51	1.87	0.35	1.33	0.16	0.57	22.69	2.8	27	0.22	0.52	0.26
L16-2	con	L	11.73	7.65	2.55	12.9	3.31	15.13	1.52	10.07	1.18	10.69	1.36	18.36	1.09	11.69	0.32	1.36	110.91	7.8	28	0.28	0.39	0.34
L16-2	con	Ah1	1.45	2.89	1.72	4.54	2.08	6.21	1.52	4.45	1.17	3.8	1.11	4.53	0.76	3.49	0.34	1.1	41.16	3.4	27.5	0.26	0.43	0.31
L16-2	con	Ah2	1.8	0.63	1.38	3.44	1.8	5.26	1.69	3.75	1.4	3.2	1.14	3.67	0.68	2.64	0.32	0.9	33.7	2.8	27.4	0.27	0.44	0.3
L17	dec	L	13.62	6.11	8.26	16.87	5	12.88	5.07	25.01	6.85	41.84	4.57	16.76	0.98	3.84	0	0	167.66	4.5	27.5	0.71	0.22	0.07
L17	dec	Ah1	0.8	0.54	0.97	3.3	0.79	3.56	1.15	4.97	1.83	8.37	1.53	4.99	0.51	1.98	0.19	0.46	35.94	4.1	27.7	0.58	0.25	0.17
L17	dec	Ah2	0.25	0.18	0.41	1.3	0.48	1.7	0.57	1.88	0.8	2.7	0.72	2.13	0.37	1.27	0.2	0.43	15.39	3.3	27.9	0.44	0.28	0.28
L17	grass	Ah1	1.12	0.27	0.44	1.21	0.57	1.86	0.56	1.66	0.41	1.51	0.44	1.4	0.29	1.16	0.14	0.44	13.48	3.3	27.6	0.3	0.37	0.32
L17	grass	Ah2	0.38	0.15	0.42	1.24	0.56	1.85	0.53	1.44	0.46	1.43	0.46	1.31	0.29	1.16	0.17	0.51	12.36	3.1	27.6	0.29	0.37	0.34
L18	con	L	19.8	8.07	13.4	38.25	9.48	33.85	2.79	8.48	0.8	5.97	1.42	8.81	1.24	4.84	0	3.51	160.71	3.9	26.1	0.12	0.7	0.17
L18	con	Ah1	5.55	2.39	6.86	18.65	3.92	18.62	2.16	6.59	2.14	7.92	2.37	8.42	1.38	4.49	0.49	1.42	93.37	3.8	26.9	0.24	0.57	0.18
L18	con	Ah2	1.48	1.03	2.68	9.09	2.02	8.59	1.99	4.05	2.02	4.95	1.97	4.56	0.92	2.06	0.23	0.45	48.09	2.7	27	0.31	0.54	0.16
L18	dec	L	21.48	8.83	8.01	31.85	5.74	17.8	2.86	8.21	4.23	26.45	1.38	4	0	2.18	0	0	143.02	4.1	26.8	0.57	0.38	0.05
L18	dec	Ah1	1.48	0.74	1.3	9.14	1.1	6.27	1	2.39	1.67	6.57	0.7	2.25	0	1.28	0	0	35.89	4.2	26.9	0.47	0.44	0.09
L18	dec	Ah2	0.93	1.44	0.78	5.04	0.89	4.44	0.75	1.78	1.01	3.19	0.54	1.3	0.2	0.52	0	0	22.81	3.3	26.5	0.39	0.54	0.06
L18	grass	Ah1	4.52	1.33	2.14	3.88	1.65	4.4	1.16	3.46	0.77	2.64	0.76	2.94	0.59	2.24	0	0.78	33.26	3.2	27.4	0.26	0.44	0.3
L18	grass	Ah2	3.41	1.07	1.69	3.13	1.44	3.81	1.09	3.03	0.89	2.53	0.87	2.69	0.56	1.94	0.23	0.69	29.07	2.9	27.4	0.28	0.42	0.29
L19	dec	L	51.74	17.53	13.45	22.21	6.02	14.54	5.38	25.11	6.92	36.2	5.68	27.12	0	7.14	0	0	239.04	4.6	27.8	0.63	0.25	0.12
L19	dec	Ah1	2.35	0.88	1.12	3.73	0.89	2.46	0.95	2.03	0.81	3.06	0.49	1.69	0.27	0.82	0	0.38	21.93	3	27.3	0.46	0.37	0.18
L19	dec	Ah2	0.5	0.34	0.46	1.45	0.63	1.58	0.65	0.89	0.66	0.89	0.43	0.67	0.21	0.68	0.22	0.55	10.81	1.8	27.1	0.24	0.43	0.33
L19	grass	Ah1	1.01	0.34	0.71	1.31	0.76	1.64	0.62	1.14	0.52	1.18	0.39	1.46	0.27	1.12	0.14	0.5	13.11	2.6	27.8	0.27	0.37	0.36
L19	grass	Ah2	0.51	0.17	0.49	0.84	0.42	1.19	0.3	0.91	0.16	0.64	0.17	0.66	0.13	0.52	0	0.26	7.37	3.3	27.2	0.25	0.46	0.3
L20	dec	L	10.32	6.07	8.1	14.05	3.28	8.62	2.76	14.98	3.44	19.1	1.88	6.43	0	1.77	0	0	100.8	4.5	27.1	0.65	0.29	0.06
L20	dec	Ah1	1.52	0.85	1.02	3.46	0.48	2.45	0.59	2.9	0.87	4.59	0.55	1.64	0	0.6	0	0	21.52	4.9	27.2	0.6	0.32	0.08
L20	dec	Ah2	0.59	0.37	0.46	1.66	0.57	2	0.69	2.43	0.88	3.4	0.79	2.23	0.37	1.02	0	0.39	17.85	3.4	27.6	0.5	0.29	0.21
L21	con	L	18.18	7.64	16.09	41.25	9.9	38.08	2.77	9.33	1.38	7.5	1.19	12.71	1.07	9.48	0	1.56	178.13	4.7	26.6	0.13	0.67	0.19
L21	con	Ah1	2.77	1.26	3.15	8.75	2.04	9.59	0.79	2.34	0.38	1.89	0.48	2.94	0.41	2.07	0	0.9	39.76	4.6	26.5	0.13	0.66	0.21
L21	con	Ah2	0.76	0.45	0.76	1.42	0.6	1.8	0.36	0.85	0.23	0.95	0.19	0.77	0	0.5	0	0.31	9.95	3.5	26.9	0.27	0.51	0.23
L21	grass	Ah1	0.89	0.38	0.47	1.3	0.9	1.9	0.51	1.48	0.27	1.24	0.23	1.02	0.17	1.16	0	0.53	12.45	3.3	27.4	0.26	0.39	0.35
L21	grass	Ah2	1.05	0.32	0.48	1.37	0.99	2.08	0.63	1.55	0.35	1.26	0.26	1.02	0.2	1.12	0.16	0.56	13.4	2.9	27.3	0.25	0.41	0.33
L22	dec	L	55.32	19.71	15.67	22.17	9.77	23.91	5.76	18.66	4.32	20.08	3.51	13.99	2.48	11.07	1	2.16	229.58	3.4	27.3	0.35	0.42	0.23
L22	dec	Ah1	3.21	1.61	2.7	7.15	4.15	12.61	4.19	11.76	3.39	12.87	2.61	7.81	1.42	3.16	0.57	1.04	80.25	3.1	27.1	0.43	0.42	0.14
L22	dec	Ah2	3.11	1.29	1.56	4.62	2.93	8.64	3.09	7.9	2.72	8.81	2.3	5.21	1.75	1.96	0.43	0.68	57	2.5	27	0.44	0.43	0.13
L23	con	L	38.89	15.45	24.62	111.16	13.74	50.37	3.44	9.14	0	5.18	1.34	8.9	1.3	5.73	0	4.46	293.72	4	25.7	0.08	0.77	0.16
L23	con	Ah1	3.8	2.47	6.82	18.45	2.98	15.06	1.35	3.7	0.58	2.72	0.73	3.61	0.74	2.68	0.42	1.58	67.69	4.4	26.2	0.12	0.68	0.19
L23	con	Ah2	0.86	0.64	1.71	5.4	0.79	4.51	0.45	1.33	0.28	1.17	0	1.18	0	0.85	0	0.45	19.62	5.9	26.3	0.17	0.65	0.19
L23	dec	L	22.88	30.6	9.9	39.28	9.95	21.24	5.31	13.68	7.84	51.68	1.73	7.94	0	2.31	0	0	224.34	3.9	27.1	0.69	0.28	0.03
L23	dec	Ah1	2.04	1.2	1.37	8.42	1.31	5.32	1.2	2.9	2.06	9.73	0.55	1.39	0	0.95	0	0	38.44	4	27	0.61	0.33	0.06
L23	dec	Ah2	0.54	0.27	0.52	1.8	0.49	1.38	0.5	0.92	0.51	1.68	0.22	0.57	0	0.23	0	0	9.63	2.8	26.9	0.51	0.42	0.07
L24	con	L	59.78	24.88	286.54	181.96	111.69	75.38	10.85	22.46	4.55	25.7	3.55	25.77	2.97	12.11	0	5.85	854.04	1.2	26.5	0.22	0.63	0.15
L24	con	Ah1	3.73	2.09	7.47	28.81	4.94	23.16	1.78	4.35	0	3.91	1.29	6.81	1.06	3.66	0	1.35	94.41	4.6	26.3	0.12	0.72	0.16
L24	con	Ah2	1.21	0.92	3.69	9.47	1.86	9.15	2.55	3.39	1.06	2.44	1.39	3.98	0.84	2.26	0.23	0.6	45.04	2.8	26.8	0.17	0.63	0.2
L25	dec	L	33.57	8.94	8.11	23.03	6.06	13.58	5.63	27.04	4.86	35.99	1.95	9.11	0	1.89	0	0	179.76	4.7	27.1	0.7	0.26	0.04
L25	dec	Ah1	1.07	3.88	0.86	3.48	1.01	3.19	1.12	2.86	1.7	5.29	0.86	2.44	0	1.21	0	0	28.97	3.2	27.4	0.55	0.33	0.12
L25	dec	Ah2	0.56	0.47	0.6	1.59	0.61	1.94	0.82	1.72	0.91	2.01	0.65	1.7	0.3	1.05	0	0.31	15.24	2.6	27.6	0.38	0.37	0.26
L26	con	L	34.19	10.87	10.01	21.66	6.62	18.04	0	13.17	0	17.81	0	16.88	0	0	0	0	149.25	9.9	27	0.5	0.5	0
L26	con	Ah1	0.62	0.51	1.54	4.3	0.98	5.95	0.72	2.31	0.64	2.54	0.77	2.94	0.52	1.95	0.22	0.67	27.18	4.3	27.1	0.23	0.54	0.24
L26	con	Ah2	1.2	0.9	1.94	4.45	1.79	4.79	1.56	2.81	1.39	2.78	1.15	2.87	0.59	1.5	0.29	0.68	30.69	2.3	27.1	0.29	0.49	0.22
L26-1	dec	L	16.17	5.36	5.37	12.39	3.94	11.99	2.03	10.15	1.78	14.7	2.25	9.09	0.88	2.87	0	0	98.97	4.5	27.2	0.5	0.41	0.1
L26-1	dec	Ah1	1.76	0.72	1.24	4.71	1.95	6.23	1.82	5.52	1.84	5.53	1.42	4.5	0.57	1.43	0	0	39.24	3.1	27.1	0.42	0.47	0.11
L26-1	dec	Ah2	5.85	1.29	1.27	3.5	1.36	3.71	1.34	2.59	1.26	2.61	0.88	2.34	0	0.76	0	0	28.76	2.5	27	0.37	0.52	0.11
L26-2	dec	L	115.91	28.12	30.06	41.96	15.4	38.66	20.68	125.89	18.08	142.62	0	50.07	0	18.73	0	0	646.18	6.9	27.4	0.71	0.19	0.09
L26-2	dec	Ah1	1.9	0.94	2.87	8.12	1.86	8.21	1.19	3.18	0.89	3.31	0.87	3.62	0.53	1.97	0	0.88	40.34	3.8	26.8	0.23	0.57	0.2
L26-2	dec	Ah2	1.9	0.74	1.31	3.29	1.18	3.58	0.92	2.02	0.77	1.67	0.56	1.65	0.34	0.89	0	0.34	21.16	2.6	26.8	0.26	0.55	0.19
