# Supplementary material for: Leaf waxes in litter and topsoils along a European transect
Source: Copernicus journal article supplement (doi:10.5194/soil-2-551-2016), 2016-10-25
Supplement: Supplementary file 12 [file Table S14.docx]

**Table S14: p-values of post-hoc tests for differences between the mean Index D and vegetation types (top) and Index D and horizons within the same vegetation type (bottom), p<0.05 indicates a significant relationship at the 95% confidence level (bold values), con= coniferous trees, dec= deciduous trees, grass= grasslands, L: litter, Ah1= topsoil 1 (0-3 cm), Ah2= topsoil 2 (3-10 cm), grey numbers indicate no significant differences in ANOVA.**

| **Vegetation types** | | | |
| --- | --- | --- | --- |
|  | **L** | **Ah1** | **Ah2** |
| con-dec | **2.7e-8** | **9.8e-8** | **0.0003** |
| con-grass | - | **0.02** | 0.81 |
| dec-grass | - | **4.1e-6** | **0.0001** |
| **Horizons** | | | |
|  | **con** | **dec** | **grass** |
| L-Ah1 | 0.29 | **0.01** | - |
| L-Ah2 | 0.29 | **7.4e-6** | - |
| Ah1-Ah2 | 0.29 | 0.07 | 0.68 |
