# Supplementary material for: Leaf waxes in litter and topsoils along a European transect
Source: Copernicus journal article supplement (doi:10.5194/soil-2-551-2016), 2016-10-25
Supplement: Supplementary file 14 [file Table S16.docx]

**Table S16: p-values of post-hoc tests for differences between the mean EOP and vegetation types (top) and between EOP and horizons within the same vegetation type (bottom), p<0.05 indicates a significant relationship at the 95% confidence level (bold values), con= coniferous trees, dec= deciduous trees, grass= grasslands, L: litter, Ah1= topsoil 1 (0-3 cm), Ah2= topsoil 2 (3-10 cm).**

| **Vegetation types** | | | |
| --- | --- | --- | --- |
|  | **L** | **Ah1** | **Ah2** |
| con-dec | 0.59 | 0.24 | 0.28 |
| con-grass | - | **0.0002** | **0.02** |
| dec-grass | - | **0.0006** | 0.12 |
| **Horizons** | | | |
|  | **con** | **dec** | **grass** |
| L-Ah1 | 0.47 | **0.003** | - |
| L-Ah2 | 0.12 | **3.0e-07** | - |
| Ah1-Ah2 | 0.67 | **0.01** | 0.36 |
