# Supplementary material for: Leaf waxes in litter and topsoils along a European transect
Source: Copernicus journal article supplement (doi:10.5194/soil-2-551-2016), 2016-10-25
Supplement: Supplementary file [file soil-2-551-2016-supplement-title-page.pdf › soil-2-551-2016-supplement-title-page.pdf]

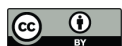

## *Supplement of*

# **Leaf waxes in litter and topsoils along a European transect**

**Imke K. Schäfer et al.**

*Correspondence to:* Imke K. Schäfer

- [soil-2-551-2016-supplement-title-page.pdf](#)
- [Figure S05.png](#)
- [Figure S07.png](#)
- [Figure S17.png](#)
- [Table S01.xlsx](#)
- [Table S02.docx](#)
- [Table S03.xlsx](#)
- [Table S04.docx](#)
- [Table S06.docx](#)
- [Table S08.docx](#)
- [Table S09.docx](#)
- [Table S10.xlsx](#)
- [Table S11.docx](#)
- [Table S12.docx](#)
- [Table S13.docx](#)
- [Table S14.docx](#)
- [Table S15.docx](#)
- [Table S16.docx](#)

The copyright of individual parts of the supplement might differ from the CC-BY 3.0 licence.
